# Supplementary material for: Restoring Mexican Tropical Dry Forests: A National Review
Source: MDPI journal article supplement (doi:10.3390/su14073937), 2022-03-26
Supplement: s1 [file s1]

**Table S1.** Summary of characteristics of Mexico TDF regions

| <b>Region</b>     | <b>Elevation (m a.s.l.)</b> | <b>Plant richness</b> |
|-------------------|-----------------------------|-----------------------|
| Pacific Coast     | 0 - 500                     | 651                   |
| Yucatan Peninsula | 0 - 190                     | > 200                 |
| Central Region    | 1,000                       | > 900                 |
| Gulf of Mexico    | 0 - 700                     | > 300                 |

**Table S2.** Soil types and fertility category of the studies that had field work, both in experimental studies and implementation of active restoration.

|    | <b>Author</b>                            | <b>Title</b>                                                                                                                                             | <b>Soil type</b> | <b>Fertility</b> |
|----|------------------------------------------|----------------------------------------------------------------------------------------------------------------------------------------------------------|------------------|------------------|
| 1  | Allen, E.B. et al.                       | Impacts of early-and late-seral mycorrhizae during restoration in seasonal tropical forest, Mexico                                                       | Rendzina         | High             |
| 2  | Allen, M.F. et al.                       | Effects of mycorrhizae and nontarget organisms on restoration of a seasonal tropical forest in Quintana Roo, Mexico: factors limiting tree establishment | Rendzina         | High             |
| 3  | Álvarez-Aquino, C. & Williams-Linera, G. | Seedling survival and growth of tree species: Site conditions and seasonality in Tropical Dry Forest restoration                                         | Vertisol         | Medium           |
| 4  | Álvarez-Aquino, C. et al.                | Soil seed bank, seed removal, and germination in a Seasonally Dry Tropical Forest in Veracruz                                                            | Vertisol         | Medium           |
| 5  | Ballina-Gomez, H.S. et al.               | Light and micorrhizal effect in seed germination of tropical dry forest tree species                                                                     | Rendzina         | High             |
| 6  | Barajas-Guzmán, M.G. & Barradas, V.L.    | Costs and benefits of mulches application in the reforestation of tropical deciduous forests                                                             | Regosol          | Low              |
| 7  | Barajas-Guzmán, M.G. & Barradas, V.L.    | Microclimate and sapling survival under organic and polyethylene mulch in a tropical dry deciduous forest                                                | Regosol          | Low              |
| 8  | Barajas-Guzman, M.G. et al.              | Soil water, nutrient availability and sapling survival under organic and polyethylene mulch in a seasonally dry tropical forest                          | Regosol          | Low              |
| 9  | Bonilla-Moheno, M. & Holl, K.            | Direct Seeding to Restore Tropical Mature-Forest Species in Areas of Slash-and-Burn Agriculture                                                          | Rendzina         | High             |
| 10 | Carrasco-Carballido, V. et al.           | Effects of Initial Soil Properties on Three-Year Performance of Six Tree Species in Tropical Dry Forest Restoration Plantings                            | Regosol          | Low              |

|    |                                          |                                                                                                                                                                 |          |        |
|----|------------------------------------------|-----------------------------------------------------------------------------------------------------------------------------------------------------------------|----------|--------|
| 11 | Castellanos-Castro, C & Bonfil, C.       | Establecimiento y crecimiento inicial de estacas de tres especies de <i>Bursera Jacq. ex L.</i>                                                                 | Acrisol  | Low    |
| 12 | Castellanos-Castro, C. & Bonfil, C.      | Propagation of three <i>Bursera</i> species from cuttings                                                                                                       | Andosol  | Medium |
| 13 | Ceccon, E. et al.                        | Biological potential of four indigenous tree species from seasonally dry tropical forest for soil restoration                                                   | Acrisol  | Low    |
| 14 | Ceccon, E. et al.                        | The effect of inoculation of an indigenous bacteria on the early Growth of <i>Acacia farnesiana</i> in a degraded area                                          | Vertisol | Medium |
| 15 | Ceccon, E. et al.                        | Tree seedling dynamics in two abandoned tropical dry forests of differing successional status in Yucatán, Mexico: a field experiment with N and P fertilization | Acrisol  | Low    |
| 16 | Cervantes, M. et al.                     | Germination of stored seeds of four tree species from the Tropical dry forest of Morelos, Mexico                                                                | Rendzina | High   |
| 17 | Diaz-Gustavo, N. et al.                  | Carbon sequestration of <i>Caesalpinia platyloba</i> S. Watt (Leguminosae)(Lott 1985) in the tropical deciduous forest                                          | Feozem   | Medium |
| 18 | Diemont, S. et al.                       | Comparisons of Mayan forest management, restoration, and conservation                                                                                           | Vertisol | Medium |
| 19 | Encino-Ruiz, L. et al.                   | Performance of three tropical forest tree species in a test deciduous ecological restoration                                                                    | Nitosol  | High   |
| 20 | Fehling-Fraser, T.C. & Ceccon, E.        | Macropropagation of <i>Erythrina americana</i> in a greenhouse: a potential tool for seasonally dry tropical forest restoration                                 | Nitosol  | High   |
| 21 | Gamboa, A.M. et al.                      | Nutrient Addition Differentially Affects Soil Carbon Sequestration in Secondary Tropical Dry Forests: Early- versus Late-Succession Stages                      | Gleysol  | High   |
| 22 | González-Tokman, D. & Martínez-Garza, C. | Effect of ecological restoration on body condition of a predator                                                                                                | Vertisol | Medium |
| 23 | Gonzalez-Tokman, D. et al.               | Performance of 11 tree species under different management treatments in restoration plantings in a tropical dry forest                                          | Rendzina | High   |
| 24 | Griscom, H.P. & Ashton, M.S.             | Restoration of dry tropical forests in Central America: a review of pattern and process                                                                         | Rendzina | High   |
| 25 | Hernández-Oria, J.G. et al.              | Early establishment and survival of the neotropical dry deciduous forest tree <i>Lysiloma microphyllum</i> from mountainous Bajío Queretano, Mexico             | Regosol  | Low    |
| 26 | Hernandez, Y. et al.                     | Lepidopteran herbivory in restored and successional sites in a Tropical Dry Forest                                                                              | Vertisol | Medium |

|    |                                          |                                                                                                                                                                         |          |        |
|----|------------------------------------------|-------------------------------------------------------------------------------------------------------------------------------------------------------------------------|----------|--------|
| 27 | Huante, P. et al.                        | The role of arbuscular mycorrhizal fungi on the early-stage restoration of seasonally dry tropical forest in Chamela, Mexico                                            | Regosol  | Low    |
| 28 | Juan-Baeza, I. et al.                    | Recovering More than Tree Cover: Herbivores and Herbivory in a Restored Tropical Dry Forest                                                                             | Regosol  | Low    |
| 29 | Luna-Nieves, A.L. et al.                 | Guiding seed source selection for the production of tropical dry forest trees: <i>Coulteria platyloba</i> as study model                                                | Regosol  | Low    |
| 30 | Mariano, N.A. et al.                     | Differential herbivory and successional status in five tropical tree species                                                                                            | Rendzina | High   |
| 31 | Martínez-Garza, C. et al.                | Ocho años de restauración experimental en las selvas estacionales de México                                                                                             | Rendzina | High   |
| 32 | Mendez-Toribio, M. et al.                | Removal of Climbing Plants and Soil Plowing as a Strategy to Enhance Forest Recovery in Tropical Dry Forests Old Field                                                  | Regosol  | Low    |
| 33 | Moreno-Casasola, P. et al.               | Germinación y supervivencia de dos especies de acahual de selva baja para restaurar dunas costeras                                                                      | Feozem   | Medium |
| 34 | Newton, A.C. et al.                      | Forest Landscape Restoration in the Drylands of Latin America                                                                                                           | Acrisol  | Low    |
| 35 | Núñez-Cruz, A. & Bonfil, C.              | Initial establishment of three species of Tropical Dry Forest in a degraded pasture: Effects of adding mulch and compost                                                | Rendzina | High   |
| 36 | Salinas-Peba, L. et al.                  | Survival and growth of dominant tree seedlings in seasonally tropical dry forests of Yucatan: site and fertilization effects                                            | Rendzina | High   |
| 37 | Sanchez-Velasquez, L.R. et al.           | Nurses for <i>Brosimum alicastrum</i> reintroduction in secondary tropical dry forest                                                                                   | Rendzina | High   |
| 38 | Williams-Linera, G. & Álvarez-Aquino, C. | Tropical dry forest landscape restoration in Central Veracruz, Mexico                                                                                                   | Cambisol | Medium |
| 39 | Williams-Linera, G. et al.               | Principles and Practice of Forest Landscape Restoration Case studies from the drylands of Latin America: Experimental analysis of dryland forest restoration techniques | Vertisol | Medium |
| 40 | Zulueta-Rodriguez, R. et al.             | Survival and growth of <i>Jacaratia mexicana</i> seedlings inoculated with arbuscular mycorrhizal fungi in a tropical dry forest                                        | Regosol  | Low    |

**Table S3.** Description of the categories of the metrics reported by the studies reviewed to evaluate the impact of the restoration studies. The variables that were included in each category are specified.

| Category                                | Description                                                                                                                        | Variables                                  | Number of studies |
|-----------------------------------------|------------------------------------------------------------------------------------------------------------------------------------|--------------------------------------------|-------------------|
| Vegetation structure                    | Metrics used to measure the recovery of the physiognomy of TDF                                                                     | Biomass                                    | 2                 |
|                                         |                                                                                                                                    | Diameter                                   | 1                 |
|                                         |                                                                                                                                    | Growth                                     | 1                 |
|                                         |                                                                                                                                    | Height                                     | 4                 |
|                                         |                                                                                                                                    | Imbibition curves                          | 1                 |
|                                         |                                                                                                                                    | Recruitment                                | 1                 |
|                                         |                                                                                                                                    | Root development                           | 2                 |
|                                         |                                                                                                                                    | Seed banks abundance                       | 1                 |
|                                         |                                                                                                                                    | Seed size                                  | 1                 |
|                                         |                                                                                                                                    | Survival                                   | 14                |
| Functional attributes of the vegetation | attributes related to the ecological and physiological functions of plants                                                         | Germination                                | 5                 |
| Ecosystem functions                     | Functions or attributes related to the ecological functionality of ecosystems                                                      | Seed viability                             | 1                 |
|                                         |                                                                                                                                    | Microclimate                               | 1                 |
| Soil attributes                         | Physical and chemical attributes of the soil                                                                                       | Body condition of fauna                    | 1                 |
|                                         |                                                                                                                                    | Litterfall                                 | 1                 |
|                                         |                                                                                                                                    | Soil initial conditions                    | 1                 |
| Biotic interactions                     | Biotic interactions between organisms in the ecosystem                                                                             | Soil nutrients                             | 1                 |
|                                         |                                                                                                                                    | Herbivory                                  | 1                 |
| Biotic composition and diversity        | Composition of species of both plants and other organisms, as well as metrics to evaluate the diversity contained in the ecosystem | Infection of frequency                     | 1                 |
|                                         |                                                                                                                                    | Plant Richness                             | 1                 |
| Services and social outcomes            | Metrics used to assess social impact, as well as the interaction of local communities with restoration projects                    | Arthropods communities                     | 1                 |
|                                         |                                                                                                                                    | Prioritized Native Species for Restoration | 1                 |

**Table S4.** Information on previous land uses reported in the studies, as well as the categories of active restoration strategies recorded in the reviewed studies.

|                     | Category          | Sub-category | Number of studies |
|---------------------|-------------------|--------------|-------------------|
| Previous Management | Cattle            |              | 19                |
|                     | Crops             |              | 13                |
|                     | Fire              |              | 2                 |
|                     | Timber extraction |              | 1                 |

|                         |                             |                |   |
|-------------------------|-----------------------------|----------------|---|
| Restoration<br>strategy | Intensive agro-<br>forestry | 1              |   |
|                         | Non-timber products         | 1              |   |
|                         | Wasteland                   | 1              |   |
|                         | <hr/>                       |                |   |
|                         | Planting                    | 32             |   |
|                         |                             | Canal building | 1 |
|                         |                             | Exclosure      | 3 |
|                         | Planting +<br>Management    | Fertilizer     | 4 |
|                         |                             | Hydrogel       | 1 |
|                         |                             | Mulch          | 3 |
|                         |                             | Nurse tree     | 1 |
|                         |                             | Watering       | 1 |
|                         | AMF Inoculation             |                |   |
|                         | Seed related                | Seeding        | 6 |
|                         |                             | Grass removal  | 1 |
|                         | Plant removal               | Herbicide      | 1 |
| Weed control            |                             | 1              |   |

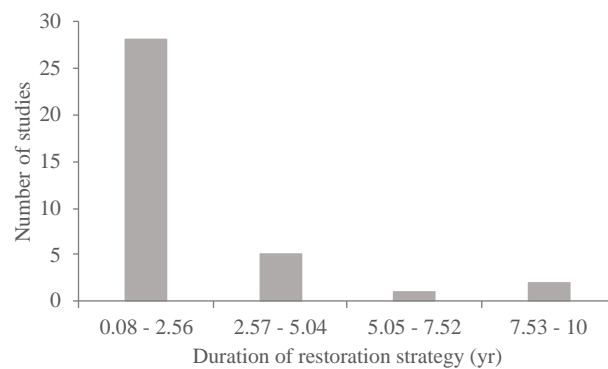

**Figure S1.** Frequency of studies in the different categories of duration of the implementation of a restoration strategy (yr).

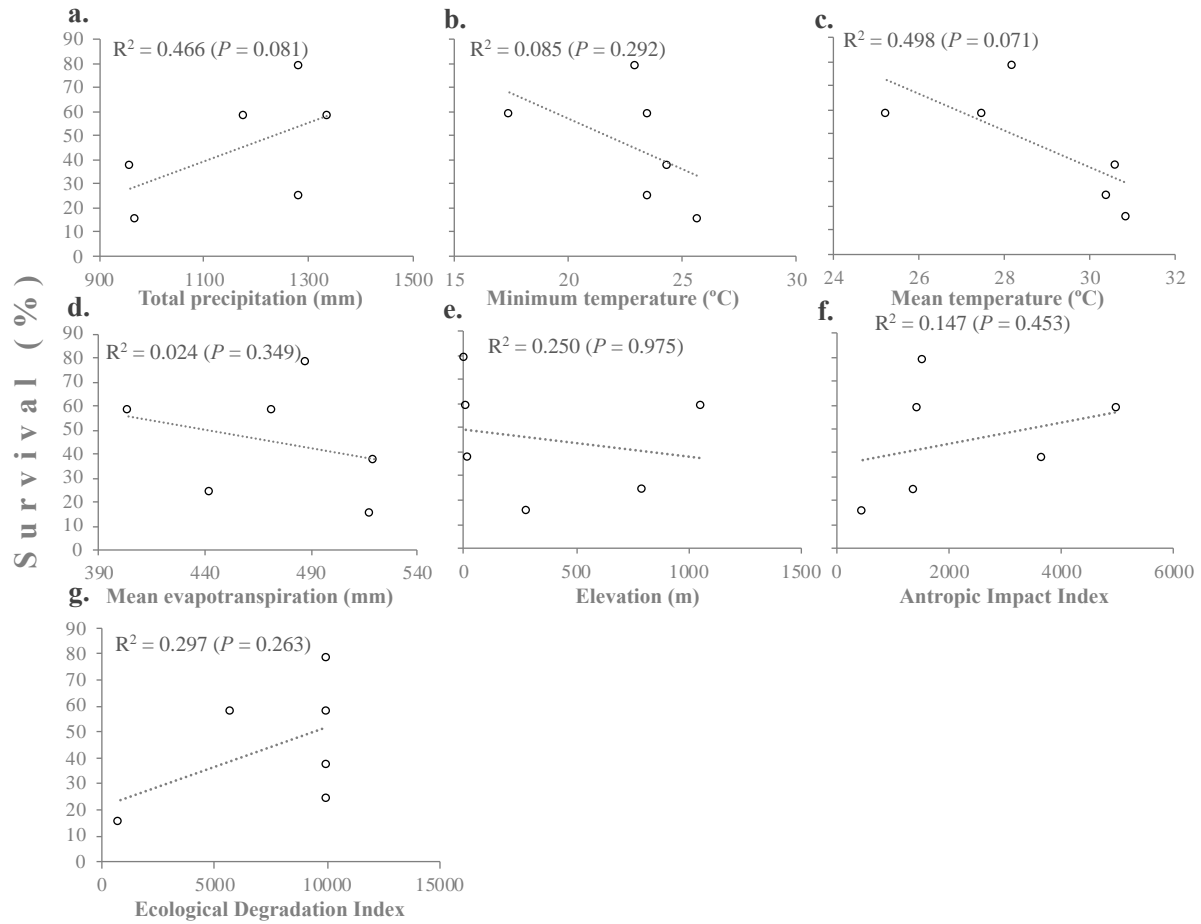

**Figure S2.** Relationships between plant survival and environment variables: (a) total annual precipitation ( $\text{mm yr}^{-1}$ ), (b) minimum annual temperature ( $^{\circ}\text{C}$ ), (c) mean annual temperature ( $^{\circ}\text{C}$ ), (d) mean evapotranspiration (mm), (e) elevation (m), (f) anthropic impact index and (g) ecological degradation index.
