# Supplementary material for: Restoring Mexican Tropical Dry Forests: A National Review
Source: MDPI journal article supplement (doi:10.3390/su14073937), 2022-03-26
Supplement: s1 [file s1]

Archive with 1 entries (1 files):
- sustainability-1629549-supplementary.pdf
